# Supplementary material for: Anti-signal recognition particle positive necrotizing myopathy-sjogren’s syndrome overlap syndrome: a descriptive study on clinical and myopathology features
Source: PubMed Central journal article supplement (PMC10035234; doi:10.1186/s12891-023-06354-5), 2023-03-23
Supplement: 12891_2023_6354_MOESM1_ESM.pdf [file 12891_2023_6354_MOESM1_ESM.pdf]

**Additional file1 Grading Scales utilised in histopathological evaluation of muscle**

| Grade | MHC class I                                                               | MAC                                          |                                                               |                               |
|-------|---------------------------------------------------------------------------|----------------------------------------------|---------------------------------------------------------------|-------------------------------|
|       |                                                                           | sarcolemmal                                  | sarcoplasm                                                    | capillary                     |
| 0     | No sarcolemmal staining                                                   | No positive fibres                           | No sarcolemmal staining                                       | No capillary staining         |
| 1     | Small numbers of fibers with sarcolemmal staining [10-30%]                | Small numbers of positive fibres [0-30%]     | Small numbers of fibres with sarcolemmal staining [0-30%]     | Mild capillary staining       |
| 2     | Moderate numbers of fibers with sarcolemmal staining [31-60%]             | Moderate numbers of positive fibres [30-50%] | Moderate numbers of fibres with sarcolemmal staining [30-50%] | Moderate capillary staining   |
| 3     | Fibers with sarcolemmal staining and scant sarcoplasmic staining [61-90%] | Many positive fibres [>50%]                  | Many fibres with sarcolemmal staining [>50%]                  | Widespread capillary staining |

MHC class I, major histocompatibility complex class I; MAC, membrane attack complex
